# Supplementary material for: Assessment of pre-industrial to present-day anthropogenic climate forcing in UKESM1
Source: Copernicus journal article supplement (doi:10.5194/acp-21-1211-2021), 2021-01-29
Supplement: Supplementary file [file acp-21-1211-2021-supplement.pdf]

Supplement of Atmos. Chem. Phys., 21, 1211–1243, 2021  
<https://doi.org/10.5194/acp-21-1211-2021-supplement>  
© Author(s) 2021. This work is distributed under  
the Creative Commons Attribution 4.0 License.

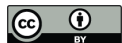

*Supplement of*

## **Assessment of pre-industrial to present-day anthropogenic climate forcing in UKESM1**

**Fiona M. O'Connor et al.**

*Correspondence to:* Fiona M. O'Connor ([fiona.oconnor@metoffice.gov.uk](mailto:fiona.oconnor@metoffice.gov.uk))

The copyright of individual parts of the supplement might differ from the CC BY 4.0 License.

| <b>Experiment ID</b>            | <b>MIP</b>       | <b>Data Citation(s)</b>                                                                    |
|---------------------------------|------------------|--------------------------------------------------------------------------------------------|
| <i>piClim-control</i>           | AerChemMIP/RFMIP | doi:10.22033/ESGF/CMIP6.6276                                                               |
| <i>piClim-4xCO2</i>             | RFMIP            | doi:10.22033/ESGF/CMIP6.11061                                                              |
| <i>piClim-N2O</i>               | AerChemMIP       | doi:10.22033/ESGF/CMIP6.9434                                                               |
| <i>piClim-HC</i>                | AerChemMIP       | doi:10.22033/ESGF/CMIP6.9433                                                               |
| <i>piClim-CH4</i>               | AerChemMIP       | doi:10.22033/ESGF/CMIP6.6229                                                               |
| <i>piClim-GHG</i>               | RFMIP            | doi:10.22033/ESGF/CMIP6.11094                                                              |
| <i>piClim-SO2</i>               | AerChemMIP       | Realisation 1: doi:10.22033/ESGF/CMIP6.9440<br>Realisation 2: doi:10.22033/ESGF/CMIP6.6261 |
| <i>piClim-BC</i>                | AerChemMIP       | doi:10.22033/ESGF/CMIP6.6225                                                               |
| <i>piClim-OC</i>                | AerChemMIP       | Realisation 1: doi:10.22033/ESGF/CMIP6.9439<br>Realisation 2: doi:10.22033/ESGF/CMIP6.6257 |
| <i>piClim-aer</i>               | AerChemMIP       | doi:10.22033/ESGF/CMIP6.6270                                                               |
| <i>piClim-NOx</i>               | AerChemMIP       | doi:10.22033/ESGF/CMIP6.6246                                                               |
| <i>piClim-VOC</i>               | AerChemMIP       | doi:10.22033/ESGF/CMIP6.6266                                                               |
| <i>piClim-O3</i>                | AerChemMIP       | doi:10.22033/ESGF/CMIP6.6254                                                               |
| <i>piClim-NTCF/piClim-aerO3</i> | AerChemMIP/RFMIP | Realisation 1: doi:10.22033/ESGF/CMIP6.8418<br>Realisation 2: doi:10.22033/ESGF/CMIP6.6249 |
| <i>piClim-LU</i>                | RFMIP            | doi:10.22033/ESGF/CMIP6.11104                                                              |
| <i>piClim-anthro</i>            | RFMIP            | doi:10.22033/ESGF/CMIP6.11090                                                              |
